# Supplementary material for: Risk factor analysis of nosocomial lower respiratory tract infection in influenza-related acute respiratory distress syndrome
Source: PubMed Central journal article supplement — Ther Adv Respir Dis. 2020 Jul 27;14:1753466620942417. doi: 10.1177/1753466620942417 (PMC7388104; doi:10.1177/1753466620942417), 2020-07-27
Supplement: Supplementary_Tables.pdf [file Supplementary_Tables.pdf]

**Supplementary Table 1. Bacteria isolated from the respiratory specimens of patients with influenza-related ARDS having NLRTI**

| Pathogen                            | No.                     |
|-------------------------------------|-------------------------|
| <i>Acinetobacter baumannii</i>      | 29 (26.6%) (96.6% CRAB) |
| <i>Stenotrophomonas maltophilia</i> | 16 (14.7%)              |
| <i>Burkholderia cepacia</i>         | 12 (11.0%)              |
| <i>Staphylococcus aureus</i>        | 10 (9.2%) (100% MRSA)   |
| <i>Pseudomonas aeruginosa</i>       | 5 (4.6%) (40% CRPA)     |
| <i>Klebsiella pneumoniae</i>        | 4 (3.7%) (100% CRKP)    |
| <i>Serratia marcescens</i>          | 4 (3.7%)                |
| <i>Chryseobacterium indologenes</i> | 4 (3.7%)                |
| <i>Enterobacter</i> sp.             | 3 (2.8%)                |
| Others                              | 22 (20.0%)              |

ARDS: acute respiratory distress syndrome; CRAB: carbapenem-resistant *Acinetobacter baumannii*; CRKP: carbapenem-resistant *Klebsiella pneumoniae*; CRPA: carbapenem-resistant *Pseudomonas aeruginosa*; MRSA: methicillin-resistant *Staphylococcus aureus*; NLRTI: nosocomial lower respiratory tract infection.

**Supplementary Table 2. Characteristics of the 250 subjects with influenza-related ARDS categorized according to in-hospital mortality**

|                                                                  | <b>Survivor<br/>(n = 165)</b> | <b>Non-survivor<br/>(n = 85)</b> | <b>P value</b> |
|------------------------------------------------------------------|-------------------------------|----------------------------------|----------------|
| <b>Baseline data</b>                                             |                               |                                  |                |
| Age (years)                                                      | 59.0 ± 14.2                   | 60.3 ± 14.9                      | 0.520          |
| Male (%)                                                         | 104 (63.0%)                   | 53 (62.4%)                       | 0.916          |
| Body mass index (kg/m <sup>2</sup> )                             | 25.5 ± 5.6                    | 24.8 ± 5.3                       | 0.316          |
| Malignancy                                                       | 14 (8.5%)                     | 18 (21.2%)                       | 0.004          |
| Type II diabetes mellitus                                        | 45 (27.3%)                    | 28 (32.9%)                       | 0.350          |
| Liver cirrhosis                                                  | 14 (8.5%)                     | 18 (21.2%)                       | 0.004          |
| Cerebrovascular disease                                          | 12 (7.3%)                     | 8 (9.4%)                         | 0.696          |
| End-stage renal disease                                          | 11 (6.7%)                     | 4 (4.7%)                         | 0.536          |
| Congestive heart failure                                         | 16 (9.7%)                     | 8 (9.4%)                         | 0.942          |
| Immunosuppressant use<br>before influenza infection <sup>a</sup> | 6 (3.6%)                      | 8 (9.4%)                         | 0.080          |
| <b>Subtypes of influenza</b>                                     |                               |                                  |                |
| Type A (%)                                                       | 137 (83.0%)                   | 61 (71.8%)                       | 0.065          |
| Type B (%)                                                       | 9 (5.5%)                      | 11 (12.9%)                       |                |
| Positive, unknown subtype<br>(%)                                 | 19 (11.5%)                    | 13 (15.3%)                       |                |
| <b>Laboratory data</b>                                           |                               |                                  |                |
| Albumin (mg/dL)                                                  | 2.9 ± 0.5                     | 2.7 ± 0.7                        | 0.011          |
| Serum C-reactive protein<br>(mg/dL)                              | 14.8 ± 10.2                   | 16.6 ± 10.3                      | 0.210          |
| Serum lactate level<br>(mg/dL)                                   | 23.2 ± 23.9                   | 41.5 ± 51.6                      | 0.004          |
| <b>Severity scores</b>                                           |                               |                                  |                |
| APACHE II                                                        | 21.5 ± 7.6                    | 27.7 ± 8.6                       | <0.001         |
| SOFA score                                                       |                               |                                  |                |
| Day 1                                                            | 9.5 ± 3.8                     | 12.5 ± 3.7                       | <0.001         |
| Day 3                                                            | 8.5 ± 3.7                     | 12.6 ± 4.2                       | <0.001         |
| Day 7                                                            | 6.9 ± 3.4                     | 11.8 ± 4.2                       | <0.001         |
| PaO <sub>2</sub> /FiO <sub>2</sub>                               | 114.0 ± 66.8                  | 91.1 ± 50.3                      | 0.003          |
| ARDS <sup>b</sup>                                                |                               |                                  | 0.026          |
| Mild                                                             | 23 (13.9%)                    | 4 (4.7%)                         |                |
| Moderate to severe<br>(%)                                        | 142 (86.1%)                   | 81 (95.3%)                       |                |

**Management**

|                                                           |             |            |        |
|-----------------------------------------------------------|-------------|------------|--------|
| ECMO <sup>c</sup> (%)                                     | 16 (9.7%)   | 31 (36.5%) | <0.001 |
| Prone position <sup>c</sup> (%)                           | 37 (22.4%)  | 21 (24.7%) | 0.686  |
| Renal replacement therapy <sup>c,d</sup> (%)              | 11 (6.7%)   | 19 (22.4%) | <0.001 |
| Vasopressor <sup>c</sup> (%)                              | 72 (43.6%)  | 62 (72.9%) | <0.001 |
| Sedation <sup>c</sup> (%)                                 | 118 (71.5%) | 67 (78.8%) | 0.212  |
| Neuromuscular blockade <sup>c</sup> (%)                   | 93 (56.4%)  | 62 (72.9%) | 0.011  |
| Steroid use <sup>c</sup> (%)                              | 100 (60.6%) | 59 (69.4%) | 0.17   |
| Mean steroid dosage <sup>c</sup> (mg/kg/day) <sup>e</sup> | 1.2 ± 2.1   | 1.1 ± 1.6  | 0.787  |
| NLRTI                                                     | 38 (23.0%)  | 34 (40.0%) | 0.005  |

<sup>a</sup> Oral prednisolone equivalent dosage > 5 mg/day or >150 mg cumulative dose within 1 month before influenza infection; or regular treatment using other immunosuppressants within 1 month before influenza infection. <sup>b</sup> In accordance with the Berlin definition. <sup>c</sup> In our cohorts, 20 (95.2%) out of 21 patients with NLRTI received ECMO before development of NLRTI. Other managements, including prone position, renal replacement therapy, vasopressors, sedatives, neuromuscular blockade, and steroid were all initiated before NLRTI. <sup>d</sup> Excluding those with end-stage renal disease receiving regular hemodialysis. <sup>e</sup> In NLRTI group, mean steroid dosage was calculated only before NLRTI. In patients without NLRTI, mean steroid dosage was calculated from steroid cumulative dosage for 14 days via prednisolone equivalent dose (mg) after ARDS. Data are presented as mean ± standard deviation and number (%). ARDS: acute respiratory distress syndrome; APACHE II: Acute Physiology and Chronic Health Evaluation; ECMO: extracorporeal membrane oxygenation; FiO<sub>2</sub>: fraction of inspired oxygen; ICU: intensive care unit; NLRTI: nosocomial lower respiratory tract infection; PaO<sub>2</sub>: arterial partial pressure of oxygen; SOFA: Sequential Organ Failure Assessment.

**Supplementary Table 3. Independent factors associated with in-hospital mortality according to multivariate logistic regression analyses**

|                  | Odds ratio | 95% Confidence interval | P value |
|------------------|------------|-------------------------|---------|
| Liver cirrhosis  | 81.616     | 3.439-1937.07           | 0.006   |
| APACHE II        | 1.194      | 1.004-1.42              | 0.045   |
| SOFA score Day 7 | 2.171      | 1.371-3.438             | 0.001   |
| ECMO use         | 25.969     | 1.609-419.238           | 0.022   |
| NLRTI            | 9.228      | 1.172-72.622            | 0.035   |
